# Supplementary material for: Intrinsic auxeticity and negative piezoelectricity in two-dimensional group-IV dipnictide monolayers with in-plane anisotropy
Source: Royal Society of Chemistry journal article supplement (doi:10.1039/d1tc00966d), 2021-01-01
Supplement: d1tc00966d1.pdf [file d1tc00966d1.pdf]

# Electronic Supplementary Information for Intrinsic Auxeticity and Negative Piezoelectricity in Two-dimensional Group-IV dipnictide monolayers with In-plane Anisotropy <sup>†</sup>

Yue Zhao,<sup>bc</sup> Gaoyang Gou,<sup>\*ac</sup> Xiaoli Lu,<sup>bc</sup> and Yue Hao,<sup>\*bc</sup>

<sup>a</sup> Frontier Institute of Science and Technology, and State Key Laboratory for Mechanical Behavior of Materials, Xi'an Jiaotong University, Xi'an 710049, China. E-mail: gougaoyang@mail.xjtu.edu.cn

<sup>b</sup> China State Key Discipline Laboratory of Wide Band Gap Semiconductor Technology, Shaanxi Joint Key Laboratory of Graphene, Advanced Interdisciplinary Research Center for Flexible Electronics, School of Microelectronics, Xidian University, Xi'an 710071, China; E-mail: yhao@xidian.edu.cn

<sup>c</sup> Collaborative Innovation Center of Quantum Information of Shaanxi Province, Xidian University, Xi'an 710071, China

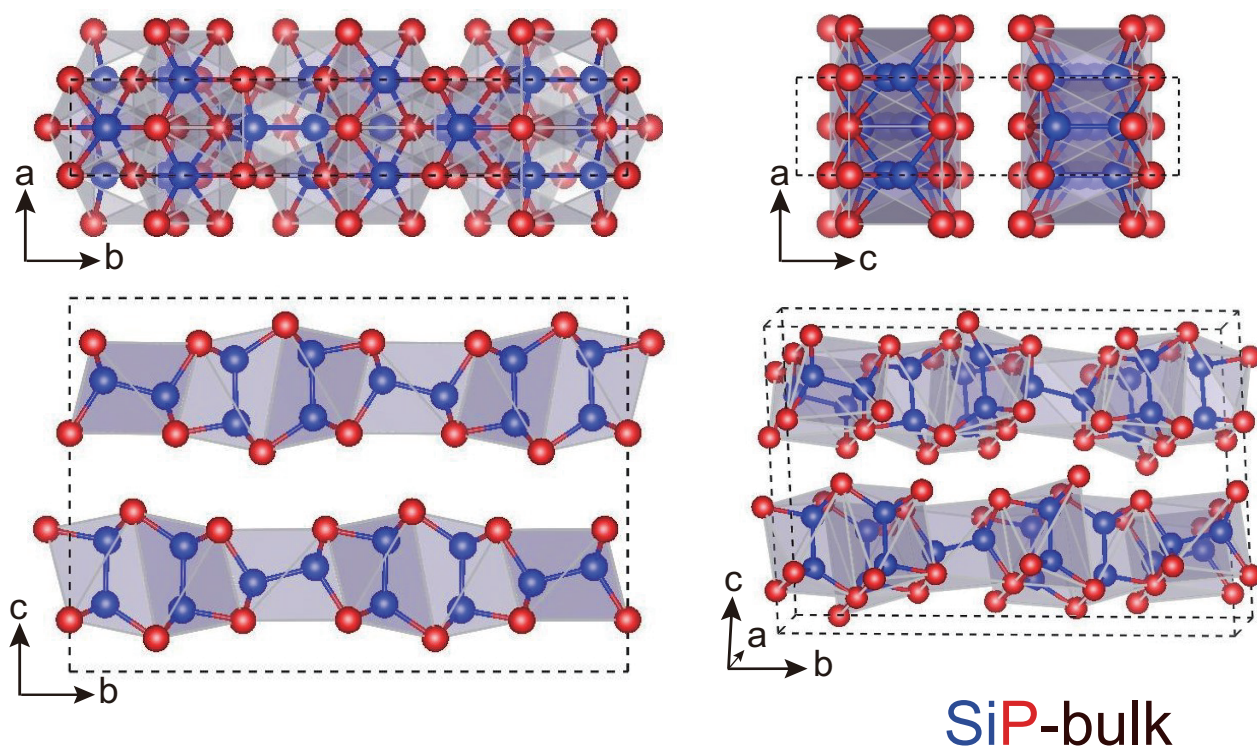

Figure S1: Crystal structure for 3D bulk SiP in orthorhombic  $Cmc2_1$  symmetry. Unit cell of bulk SiP is indicated by dashed lines. Si and P atoms are marked in blue and red colors, respectively.

Table S1: Comparison of our calculated (Cal) lattice parameters with experimental (Exp)<sup>1-6</sup> results for all  $AB$  and  $AB_2$  ( $A = \text{Si}$  and  $\text{Ge}$ ,  $B = \text{P}$  and  $\text{As}$ ) bulk compounds.

|                   |     | a (Å) | b (Å) | c (Å) | Symmetry | $\beta$ |
|-------------------|-----|-------|-------|-------|----------|---------|
| GeP               | Cal | 15.16 | 3.62  | 9.15  | $C2/m$   | 101.1°  |
|                   | Exp | 15.44 | 3.64  | 9.19  | $C2/m$   | 101.1°  |
| GeAs              | Cal | 15.53 | 3.78  | 9.45  | $C2/m$   | 100.7°  |
|                   | Exp | 15.59 | 3.79  | 9.49  | $C2/m$   | 101.3°  |
| SiAs              | Cal | 16.04 | 3.66  | 9.53  | $C2/m$   | 106.1°  |
|                   | Exp | 15.98 | 3.67  | 9.53  | $C2/m$   | 106.0°  |
| SiP               | Cal | 13.69 | 3.51  | 20.46 | $Cmc2_1$ | 90°     |
|                   | Exp | 13.96 | 3.54  | 20.85 | $Cmc2_1$ | 90°     |
| GeP <sub>2</sub>  | Cal | 14.33 | 3.49  | 9.91  | $Pbam$   |         |
|                   | Exp | NA    | NA    | NA    |          |         |
| GeAs <sub>2</sub> | Cal | 14.75 | 3.72  | 10.13 | $Pbam$   |         |
|                   | Exp | 14.76 | 3.73  | 10.16 | $Pbam$   |         |
| SiP <sub>2</sub>  | Cal | 14.38 | 3.42  | 9.84  | $Pbam$   |         |
|                   | Exp | 13.97 | 3.44  | 10.08 | $Pbam$   |         |
| SiAs <sub>2</sub> | Cal | 14.88 | 3.65  | 10.07 | $Pbam$   |         |
|                   | Exp | 14.53 | 3.64  | 10.37 | $Pbam$   |         |

Table S2: Comparison of our optimized the planar lattice parameters with the results reported by other work for 2D  $AB$  and  $AB_2$  monolayers with orthorhombic lattice.

|                   |        | b (Å)                                   | c (Å)                                     | Symmetry |
|-------------------|--------|-----------------------------------------|-------------------------------------------|----------|
| GeP               | Ours   | 3.59                                    | 21.07                                     | $C2/m$   |
|                   | Others | 3.648 <sup>7</sup>                      | 21.393 <sup>7</sup>                       | $C2/m$   |
| GeAs              | Ours   | 3.73                                    | 21.75                                     | $C2/m$   |
|                   | Others | 3.803, <sup>7</sup> 3.78 <sup>8</sup>   | 22.129, <sup>7</sup> 22.07 <sup>8</sup>   | $C2/m$   |
| SiP               | Ours   | 3.50                                    | 20.35                                     | $C2/m$   |
|                   | Others | 3.519, <sup>7</sup> 3.521 <sup>9</sup>  | 20.449, <sup>7</sup> 20.479 <sup>9</sup>  | $C2/m$   |
| SiAs              | Ours   | 3.65                                    | 21.08                                     | $C2/m$   |
|                   | Others | 3.682, <sup>7</sup> 3.66 <sup>8</sup>   | 21.246, <sup>7</sup> 21.19 <sup>8</sup>   | $C2/m$   |
| GeP <sub>2</sub>  | Ours   | 3.48                                    | 10.15                                     | $Pmc2_1$ |
|                   | Others | 3.53, <sup>10</sup> 3.522 <sup>11</sup> | 10.51, <sup>10</sup> 10.205 <sup>11</sup> | $Pmc2_1$ |
| GeAs <sub>2</sub> | Ours   | 3.69                                    | 10.32                                     | $Pmc2_1$ |
|                   | Others | 3.761 <sup>11</sup>                     | 10.398 <sup>11</sup>                      | $Pmc2_1$ |
| SiP <sub>2</sub>  | Ours   | 3.42                                    | 10.04                                     | $Pmc2_1$ |
|                   | Others | 3.442 <sup>11</sup>                     | 10.045 <sup>11</sup>                      | $Pmc2_1$ |
| SiAs <sub>2</sub> | Ours   | 3.63                                    | 10.29                                     | $Pmc2_1$ |
|                   | Others | 3.674 <sup>11</sup>                     | 10.300 <sup>11</sup>                      | $Pmc2_1$ |

Table S3: The summary of the predicted in-plane NPR for single-layer (SL) PdSe<sub>2</sub>,<sup>12</sup> SL GaPS<sub>4</sub>,<sup>13</sup> penta-graphene,<sup>14</sup> SL Ag<sub>2</sub>S,<sup>15</sup> SL Mo<sub>2</sub>C,<sup>16</sup> Be<sub>5</sub>C<sub>2</sub>,<sup>17</sup> penta-B<sub>4</sub>N<sub>2</sub>,<sup>18</sup> SL Se<sub>3</sub>P<sub>2</sub>,<sup>19</sup> 2D VF<sub>4</sub>,<sup>20</sup>  $\delta$ -phosphorene,<sup>21</sup>  $\delta$ -V<sup>A</sup>N (V<sup>A</sup> = P, As, Sb, Bi),<sup>22</sup> SL SiAs<sub>2</sub>, W<sub>2</sub>C<sup>23</sup> and TcTe<sub>2</sub>.<sup>24</sup> Those 2D materials synthesized either in 3D vdW bulk or 2D layered structural forms in experiment are marked by \*. SiAs<sub>2</sub> monolayer characterizes the in-plane NPR of largest magnitude among all synthetic 2D auxetic materials.

| 2D materials                      | In-plane NPR |
|-----------------------------------|--------------|
| SL PdSe*                          | -0.022       |
| SL GaPS <sub>4</sub> *            | -0.033       |
| Penta-graphene                    | -0.068       |
| SL Ag <sub>2</sub> S              | -0.12        |
| SL Mo <sub>2</sub> C*             | -0.15        |
| Be <sub>5</sub> C <sub>2</sub>    | -0.16        |
| SL Se <sub>3</sub> P <sub>2</sub> | -0.199       |
| 2D VF <sub>4</sub> *              | -0.26        |
| $\delta$ -Phosphorene             | -0.267       |
| $\delta$ -PN                      | -0.268       |
| $\delta$ -AsN                     | -0.177       |
| $\delta$ -SbN                     | -0.296       |
| $\delta$ -BiN                     | -0.260       |
| SL SiAs <sub>2</sub> *            | -0.32        |
| TcTe <sub>2</sub>                 | -0.37        |
| W <sub>2</sub> C                  | -0.43        |

Table S4: Comparison of our calculated energy band gaps ( $E_g$  in eV) and anisotropic carrier effective masses  $m_e^*/m_0$  and  $m_h^*/m_0$  using HSE06 functional with the results reported by other work for all  $AB$  and  $AB_2$  monolayers. The simulated direct and indirect  $E_g$  are marked by subscript indices  $D$  and  $I$ , respectively.

|                   |        | $m_e^*/m_0$                    |                                | $m_h^*/m_0$                    |                                | $E_g$                      |
|-------------------|--------|--------------------------------|--------------------------------|--------------------------------|--------------------------------|----------------------------|
|                   |        | $\Gamma$ -X                    | $\Gamma$ -Y                    | $\Gamma$ -X                    | $\Gamma$ -Y                    |                            |
| GeP               | Ours   | 0.36                           | 0.72                           | 0.93                           | 0.56                           | $2.48_I$                   |
|                   | Others | $0.053,^7 0.40^{25}$           | $0.004,^7 0.72^{25}$           | $0.175,^7 0.98^{25}$           | $0.004,^7 0.57^{25}$           | $2.309_I^7$                |
| GeAs              | Ours   | 0.13                           | 0.9                            | 0.78                           | 0.22                           | $2.22_D$                   |
|                   | Others | $0.118,^7 0.1328,^8 0.12^{26}$ | $0.004,^7 0.0178,^8 0.25^{26}$ | $0.152,^7 0.6221,^8 0.84^{26}$ | $0.002,^7 0.0068,^8 0.24^{26}$ | $2.077_D,^7 2.06_I^8$      |
| SiP               | Ours   | 0.14                           | 0.57                           | 1.06                           | 0.73                           | $2.64_I(2.65_D)$           |
|                   | Others | $0.111,^7 0.24^9$              | $0.062,^7 0.70^9$              | $0.351,^7 0.42^9$              | $0.050,^7 0.44^9$              | $2.641_D,^7 2.59_D^9$      |
| SiAs              | Ours   | 0.11                           | 0.37                           | 0.84                           | 0.22                           | $2.43_D$                   |
|                   | Others | $0.050,^7 0.1025,^8 0.14^{26}$ | $0.003,^7 0.0195,^8 0.88^{26}$ | $0.137,^7 0.6975,^8 0.94^{26}$ | $0.002,^7 0.0062,^8 0.22^{26}$ | $2.353_D,^7 2.50_D^8$      |
| GeP <sub>2</sub>  | Ours   | 0.13                           | 1.23                           | 1.39                           | 0.32                           | $2.08_I(2.10_D)$           |
|                   | Others | $0.14^{10}$                    | $1.29^{10}$                    | $1.54^{10}$                    | $0.38^{10}$                    | $2.21_I,^{10} 1.96_D^{11}$ |
| GeAs <sub>2</sub> | Ours   | 0.13                           | 0.56                           | 0.43                           | 0.63                           | $1.78_I$                   |
|                   | Others | NA                             | NA                             | NA                             | NA                             | $1.64_I^{11}$              |
| SiP <sub>2</sub>  | Ours   | 0.12                           | 2.10                           | 3.99                           | 1.12                           | $2.25_I(2.28_D)$           |
|                   | Others | NA                             | NA                             | NA                             | NA                             | $2.23_D^{11}$              |
| SiAs <sub>2</sub> | Ours   | 0.13                           | 0.41                           | 0.85                           | 2.20                           | $2.04_I$                   |
|                   | Others | NA                             | NA                             | NA                             | NA                             | $1.92_I^{11}$              |

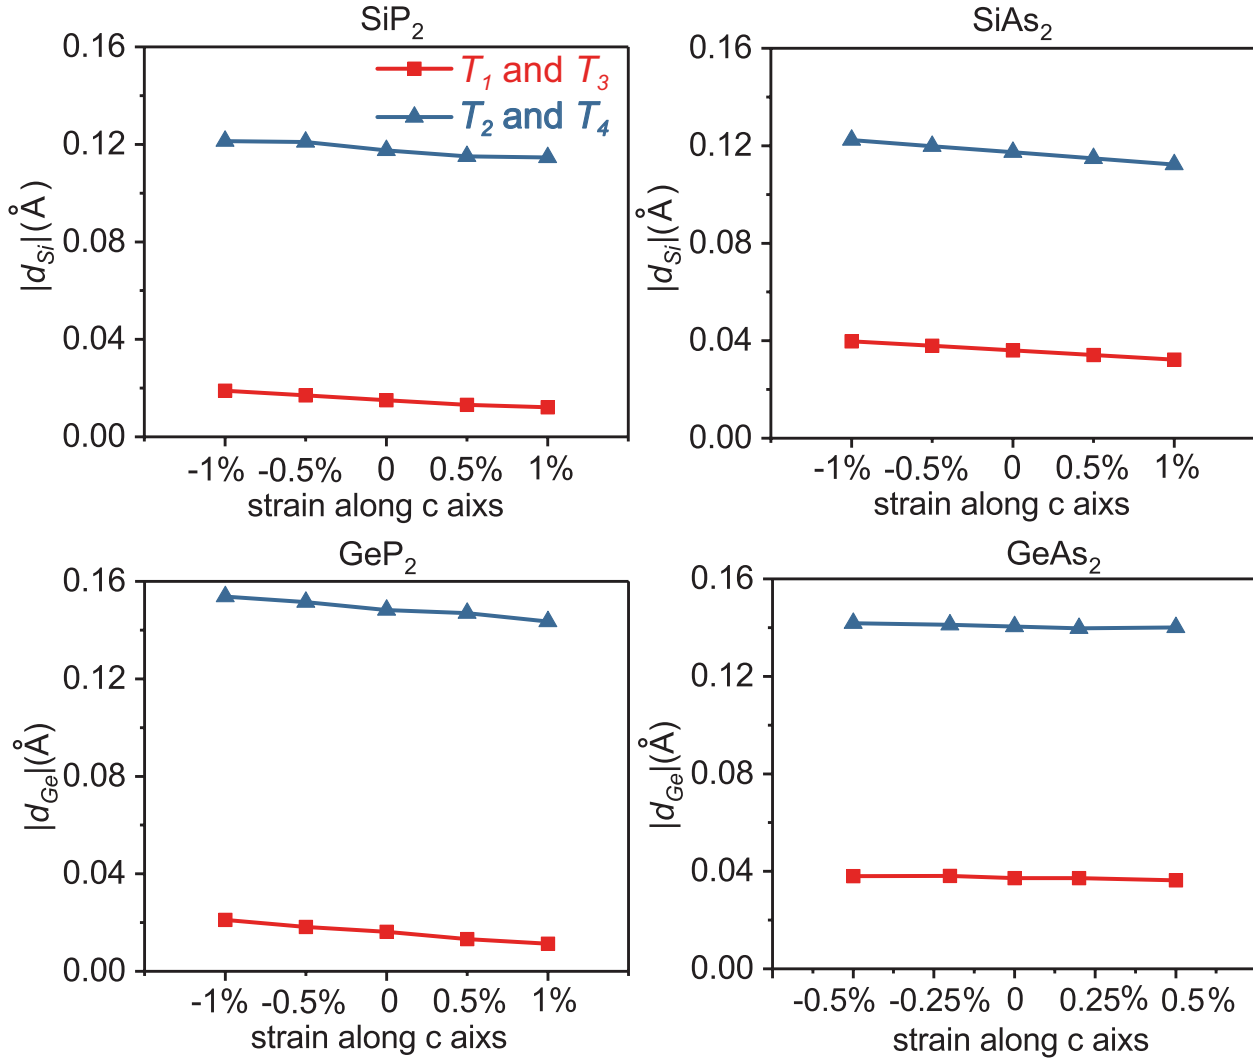

Figure S2: The evolution of cation polar displacement relative to anion tetrahedral center of  $AB_2$  monolayers, as a function of uniaxial strain applied along the polar  $c$  axis. Four tetrahedrons (marked as  $T_1$ ,  $T_2$ ,  $T_3$ , and  $T_4$ .) within  $AB_2$  monolayers can yield two distinct polar displacement. Reducing (increasing) the magnitude of polar displacement along the polar  $c$  axis by applying tensile (compressive) uniaxial strain will lead to the overall negative piezoelectric coefficients  $e_{33}^{2D}$  ( $d_{33}^{2D}$ ) for  $AB_2$  monolayers.

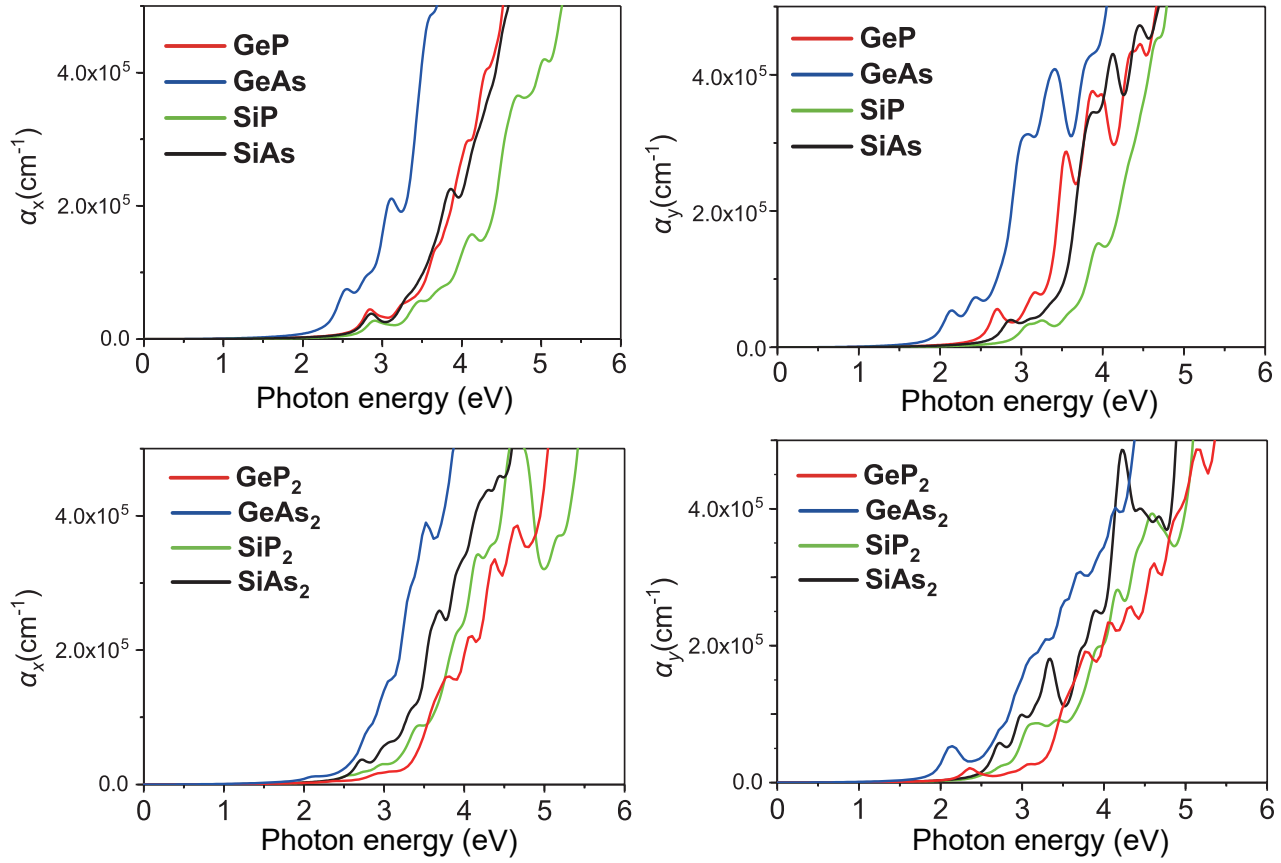

Figure S3: The HSE06 calculations predicted photon energy dependent optical absorption coefficients  $\alpha_x$  and  $\alpha_y$  for all  $AB$  and  $AB_2$  monolayers under incident light polarized along crystallographic  $b$  and  $c$  axes, respectively.

## References

- [1] T. Wadsten, *Acta Chem. Scand.*, 1965, **19**, 1232.
- [2] T. Wadsten, *Acta Chem. Scand.*, 1967, **21**, 1374.
- [3] Y. H. S. Donahue, P. C., *J. Solid State Chem.*, 1970, **1**, 143.
- [4] S. H. Bryden, *Acta Crystallogr.*, 1962, **15**, 167.
- [5] A. S. Spring-Thorpe, *Mater. Res. Bull.*, 1967, **4**, 125.
- [6] S. W. J. G. J. L. Donahue, P. C., *J. Phys. Chem. Solids*, 1968, **29**, 807.
- [7] A.-Q. Cheng, Z. He, J. Zhao, H. Zeng and R.-S. Chen, *ACS Appl. Mater. Interfaces*, 2018, **10**, 5133–5139.
- [8] L. Zhou, Y. Guo and J. Zhao, *Phys. E*, 2018, **95**, 149–153.
- [9] S. Zhang, S. Guo, Y. Huang, Z. Zhu, B. Cai, M. Xie, W. Zhou and H. Zeng, *2D Mater.*, 2017, **4**, 015030.
- [10] P. Li, W. Zhang, D. Li, C. Liang and X. C. Zeng, *ACS Appl. Mater. Interfaces*, 2018, **10**, 19897–19905.
- [11] Y. Xu, Z. Li, C. He, J. Li, T. Ouyang, C. Zhang, C. Tang and J. Zhong, *Appl. Phys. Lett.*, 2020, **116**, 023103.
- [12] G. Liu, Q. Zeng, P. Zhu, R. Quhe and P. Lu, *Comput. Mater. Sci.*, 2019, **160**, 309–314.
- [13] J. Yuan, K. Xue, J. Wang and X. Miao, *J. Phys. Chem. Lett.*, 2019, **10**, 4455–4462.
- [14] S. Zhang, J. Zhou, Q. Wang, X. Chen, Y. Kawazoe and P. Jena, *Proc. Natl. Acad. Sci.*, 2015, **112**, 2372–2377.
- [15] R. Peng, Y. Ma, Z. He, B. Huang, L. Kou and Y. Dai, *Nano Lett.*, 2019, **19**, 1227–1233.
- [16] B. Mortazavi, M. Shahrokhi, M. Makaremi and T. Rabczuk, *Nanotechnol.*, 2017, **28**, 115705.
- [17] Y. Wang, F. Li, Y. Li and Z. Chen, *Nat. Commun.*, 2016, **7**, 11488.
- [18] M. Yagmurcukardes, H. Sahin, J. Kang, E. Torun, F. M. Peeters and R. T. Senger, *J. Appl. Phys.*, 2015, **118**, 104303.
- [19] Y. Chen, X. Liao, X. Shi, H. Xiao, Y. Liu and X. Chen, *Phys. Chem. Chem. Phys.*, 2019, **21**, 5916–5924.
- [20] L. Zhang, C. Tang and A. Du, *J. Mater. Chem. C*, 2021, **9**, 95–100.
- [21] H. Wang, X. Li, P. Li and J. Yang, *Nanoscale*, 2017, **9**, 850–855.
- [22] W. Xiao, G. Xiao, Q. Rong and L. Wang, *Phys. Chem. Chem. Phys.*, 2018, **20**, 22027–22037.
- [23] D. Wu, S. Wang, S. Zhang, J. Yuan, B. Yang and H. Chen, *Phys. Chem. Chem. Phys.*, 2018, **20**, 18924–18930.
- [24] L. Yu, Q. Yan and A. Ruzsinszky, *Nat. Commun.*, 2017, **8**, 15224.
- [25] L. Li, W. Wang, P. Gong, X. Zhu, B. Deng, X. Shi, G. Gao, H. Li and T. Zhai, *Adv. Mater.*, 2018, **30**, 1706771.
- [26] P. Li, W. Wu, Y. Xu, J. Liu, S. Wu, Y. Ye, C. Liang and X. C. Zeng, *J. Phys. Chem. Lett.*, 2021, **12**, 1058–1065.
